# Supplementary material for: Genetic Map Construction and Functional Characterization of Genes within the Segregation Distortion Regions (SDRs) in the F2:3 Populations Derived from Wild Cotton Species of the D Genome
Source: Research Square preprint supplement (doi:10.21203/rs.3.rs-30612/v3), 2020-10-27
Supplement: Supplementary file 1 [file 99bdd441e4091fae10d29cca.docx]

Table S5 *Cis*-regulatory prmoter elements identified for the genes obtained within the SDR regions

| **Cis element** | **Sequence** | **number of genes** | **Function** |
| --- | --- | --- | --- |
| ABREATCONSENSUS | YACGTGGC | 3 | ABA-responsive element binding factors |
| CBFHV | RYCGAC | 63 | dehydration-responsive element / cold acclimation |
| WRKY71OS | TGAC | 1 | Early nuclear events in plant defense signalling |
| ABREOSRAB21 | ACGTSSSC | 11 | Regulation of abscisic acid-induced transcription |
| DRECRTCOREAT | RCCGAC | 35 | activators that function in drought-, high-salt- and cold responsive gene |
| ABRELATERD1 | ACGTG | 47 | early responsive to dehydration |
| ACGTATERD1 | ACGT | 74 | early responsive to dehydration |
| AGMOTIFNTMYB2 | AGATCCAA | 11 | induced by various stress such as wounding or elicitor treatment |
| ABREATRD22 | RYACGTGGYR | 2 | Plant responses to water deficit |
| ABREBNNAPA | CGCCACGTGTCC | 1 | Regulation of abscisic acid-induced transcription |
| ABRECE1HVA22 | TGCCACCGG | 1 | Regulation of abscisic acid-induced transcription |
| ABREDISTBBNNAPA | GCCACTTGTC | 1 | Regulation of abscisic acid-induced transcription |
| DRE1COREZMRAB17 | ACCGAGA | 31 | regulation through the drought-responsive element |
| DRE2COREZMRAB17 | ACCGAC | 25 | regulation through the drought-responsive element |
| ARFAT | TGTCTC | 54 | targeted to promoters responsive to ABA and auxin |
| ARR1AT | NGATT | 87 | targeted to promoters responsive to ABA and auxin |
| -10PEHVPSBD | TATTCT | 67 | targeted to promoters responsive to ABA and auxin |
| 2SSEEDPROTBANAPA | CAAACAC | 20 | targeted to promoters responsive to ABA and auxin |
| -300CORE | TGTAAAG | 16 | targeted to promoters responsive to ABA and auxin |
| -300ELEMENT | TGHAAARK | 62 | targeted to promoters responsive to ABA and auxin |
| -300MOTIFZMZEIN | RTGAGTCAT | 1 | targeted to promoters responsive to ABA and auxin |
| AACACOREOSGLUB1 | AACAAAC | 21 | targeted to promoters responsive to ABA and auxin |
| ABRERATCAL | MACGYGB | 33 | targeted to promoters responsive to ABA and auxin |
| ABRETAEM | GGACACGTGGC | 1 | targeted to promoters responsive to ABA and auxin |
| ACGTABOX | TACGTA | 6 | targeted to promoters responsive to ABA and auxin |
| ACGTABREMOTIFA2OSEM | ACGTGKC | 6 | targeted to promoters responsive to ABA and auxin |
| ACGTCBOX | GACGTC | 13 | targeted to promoters responsive to ABA and auxin |
| ACGTOSGLUB1 | GTACGTG | 3 | targeted to promoters responsive to ABA and auxin |
| ACGTTBOX | AACGTT | 18 | targeted to promoters responsive to ABA and auxin |
| AGATCONSENSUS | TTWCCWWWWNNGGWW | 2 | targeted to promoters responsive to ABA and auxin |
| AGCBOXNPGLB | AGCCGCC | 5 | targeted to promoters responsive to ABA and auxin |
| AGL1ATCONSENSUS | NTTDCCWWWWNNGGWAAN | 4 | targeted to promoters responsive to ABA and auxin |
| AGL2ATCONSENSUS | NNWNCCAWWWWTRGWWAN | 6 | targeted to promoters responsive to ABA and auxin |
| AGL3ATCONSENSUS | TTWCYAWWWWTRGWAA | 2 | targeted to promoters responsive to ABA and auxin |
| AMMORESIIUDCRNIA1 | GGWAGGGT | 23 | targeted to promoters responsive to ABA and auxin |
| AMMORESIVDCRNIA1 | CGAACTT | 12 | targeted to promoters responsive to ABA and auxin |
| AMYBOX1 | TAACARA | 19 | targeted to promoters responsive to ABA and auxin |
