# Supplementary material for: Genetic Map Construction and Functional Characterization of Genes within the Segregation Distortion Regions (SDRs) in the F2:3 Populations Derived from Wild Cotton Species of the D Genome
Source: Research Square preprint supplement (doi:10.21203/rs.3.rs-30612/v3), 2020-10-27
Supplement: Supplementary file 2 [file ac7f94aa1f87ceede88e69d3.docx]

Table S6 miRNA targets prediction

| **miRNA_Acc.** | **Target_Acc.** | **Expectation** | **miRNA_start** | **miRNA_end** | **Target_start** | **Target_end** | **miRNA_aligned_fragment** | **Target_aligned_fragment** | **Inhibition** |
| --- | --- | --- | --- | --- | --- | --- | --- | --- | --- |
| gra-miR8707 | Gorai.002G032600 | 5 | 1 | 24 | 926 | 949 | AUAAAAACUUUUGAAUAAUUCAGU | GGGUGUUUGUUUACGAGUUGUUAU | Translation |
| gra-miR8754 | Gorai.002G032600 | 4.5 | 1 | 24 | 1204 | 1227 | UGCCGCCUGACACACUGACGACAC | CCGGAGGUAGUGGGUGGGGCGGCG | Translation |
| gra-miR7484j | Gorai.002G039900 | 4 | 1 | 23 | 1438 | 1460 | UUUACUCUUUGAUCUAACGUACA | GACCGGUUAGAUCAAGGAGAGGA | Cleavage |
| gra-miR7504h | Gorai.002G039900 | 3.5 | 1 | 24 | 317 | 340 | AGGAGGAAUAAGUCUGAUUUGUCA | AUCAUUAUAAUACUUAUUCCUCUU | Cleavage |
| gra-miR8659a | Gorai.002G039900 | 3.5 | 1 | 24 | 748 | 771 | AAUUUUUUAAGGUUGUUUGUGGAA | UCUUUCAAACAAGUUAAAAAAAUG | Translation |
| gra-miR8659b | Gorai.002G039900 | 3.5 | 1 | 24 | 748 | 771 | AAUUUUUUAAGGUUGUUUGUGGAA | UCUUUCAAACAAGUUAAAAAAAUG | Translation |
| gra-miR8661 | Gorai.002G039900 | 2.5 | 1 | 21 | 1481 | 1500 | CAUUACUUUUUCAUUCAUUAA | CUGAUGA-UGAAAAAGUAAUG | Cleavage |
| gra-miR8676 | Gorai.002G039900 | 4 | 1 | 23 | 89 | 111 | AAGGUUGAUGGUUAAAUUUGACU | GUGGGAAUUUGAAUAUCAGUUUU | Translation |
| gra-miR7584e | Gorai.002G040100 | 2 | 1 | 21 | 28 | 48 | AGGAGUUAGAUUGUAUUUUAU | CAAAACUACAAUUUAGCUCCU | Cleavage |
| gra-miR8662 | Gorai.002G040200 | 4.5 | 1 | 24 | 204 | 227 | GGCGUACUUUCAGAGAACAUUUUG | UAAAAUGUUCUUUGCAGGUUUGUC | Translation |
| gra-miR8639a | Gorai.002G041100 | 4 | 1 | 24 | 318 | 341 | UAAACAUAAGUAGAAUUAAACAAG | UCCUCUUAGUUCUGUAUAUGAUUA | Translation |
| gra-miR8639b | Gorai.002G041100 | 4 | 1 | 24 | 318 | 341 | UAAACAUAAGUAGAAUUAAACAAG | UCCUCUUAGUUCUGUAUAUGAUUA | Translation |
| gra-miR8639c | Gorai.002G041100 | 4 | 1 | 24 | 318 | 341 | UAAACAUAAGUAGAAUUAAACAAG | UCCUCUUAGUUCUGUAUAUGAUUA | Translation |
| gra-miR8639d | Gorai.002G041100 | 4 | 1 | 24 | 318 | 341 | UAAACAUAAGUAGAAUUAAACAAG | UCCUCUUAGUUCUGUAUAUGAUUA | Translation |
| gra-miR8639e | Gorai.002G041100 | 4 | 1 | 24 | 318 | 341 | UAAACAUAAGUAGAAUUAAACAAG | UCCUCUUAGUUCUGUAUAUGAUUA | Translation |
| gra-miR8639f | Gorai.002G041100 | 4 | 1 | 24 | 318 | 341 | UAAACAUAAGUAGAAUUAAACAAG | UCCUCUUAGUUCUGUAUAUGAUUA | Translation |
| gra-miR8639g | Gorai.002G041100 | 4 | 1 | 24 | 318 | 341 | UAAACAUAAGUAGAAUUAAACAAG | UCCUCUUAGUUCUGUAUAUGAUUA | Translation |
| gra-miR8639h | Gorai.002G041100 | 4 | 1 | 24 | 318 | 341 | UAAACAUAAGUAGAAUUAAACAAG | UCCUCUUAGUUCUGUAUAUGAUUA | Translation |
| gra-miR8639i | Gorai.002G041100 | 4 | 1 | 24 | 318 | 341 | UAAACAUAAGUAGAAUUAAACAAG | UCCUCUUAGUUCUGUAUAUGAUUA | Translation |
| gra-miR7484k | Gorai.002G041800 | 4 | 1 | 24 | 151 | 174 | UUUAUACAUUAGAUCAAAGAGCAA | UAUGACUUUGAACUUGUGUGUGAG | Translation |
| gra-miR7484n | Gorai.002G042100 | 4 | 1 | 24 | 1012 | 1035 | CUAGUUUGCUCUUUGAUCUAAUGU | CGAUUAGAUCAAGGAGAGGACUUG | Cleavage |
| gra-miR8783 | Gorai.002G042100 | 4 | 1 | 21 | 274 | 294 | UUUGUACGUGGCGGGAGAUAU | UUUGCUCUUGUUACGUACAAA | Cleavage |
| gra-miR3267 | Gorai.002G047500 | 3.5 | 1 | 22 | 203 | 224 | UCUGUCGCAGGGGAGAUGGCUG | GCACCAUCUUCCCUACGGAAGA | Cleavage |
| gra-miR7492o | Gorai.002G047500 | 4.5 | 1 | 24 | 1509 | 1532 | CUAAAGAUCUGAGCAUUAGUGGCG | UAAAGCUGAUGUUUAUAGCUUUGG | Translation |
| gra-miR7504d | Gorai.002G047500 | 2.5 | 1 | 24 | 1588 | 1611 | AGGAAAAAAAAUCUGAUUUGUCAU | AAUUCAAGUCAAAUUUAUUUUCCU | Cleavage |
| gra-miR8697 | Gorai.002G047500 | 4 | 1 | 24 | 9 | 32 | AGGGAAAUUGAUUCAAGUGAGCAU | ACCAAAACUUGCAUUAAUUUGCCU | Cleavage |
| gra-miR8771f | Gorai.002G047500 | 5 | 1 | 23 | 221 | 243 | UUGGACAUCCAAGUUAGCAUUUA | AAGAUGGGGAUUUCUAUGUCCAA | Translation |
| gra-miR7486c | Gorai.002G047900 | 4.5 | 1 | 24 | 274 | 297 | UUUGUCCACGUGAACAGAAAACGC | AUUGUUGAUGUGAAUGUGGACAAA | Cleavage |
| gra-miR8653a | Gorai.002G047900 | 3 | 1 | 21 | 1671 | 1691 | UAAAUCUACGUAUGGAAAUUC | UUAUUUUCCUACAUGGAUUUA | Translation |
| gra-miR8724 | Gorai.002G047900 | 3.5 | 1 | 23 | 1885 | 1907 | CCUGACAUGUCAGUAGAAAGCUC | AUAUUUUCUGUGGACAUGUCAUG | Cleavage |
| gra-miR8730 | Gorai.002G047900 | 4.5 | 1 | 24 | 1406 | 1429 | CUAAGAGAUUGGGAUUUGGUAGGA | UCAAGCCACAUAACAUUCUUUUAG | Translation |
| gra-miR8752 | Gorai.002G047900 | 4.5 | 1 | 21 | 1276 | 1296 | UGAUGGAGAUAGGUAUCUGCA | GACAAAUUUAUAUUUUCAUCA | Cleavage |
| gra-miR8649 | Gorai.002G049400 | 4.5 | 1 | 24 | 92 | 115 | ACACUGUGGAAGUGGAUCUCUCUC | CUGCAAUAUUUAAUUCCACAUUGU | Cleavage |
| gra-miR8674b | Gorai.002G049400 | 4.5 | 1 | 24 | 285 | 308 | UUAGAAAUGGACCAUGGAUGAUGU | UUACUUUUCAGGGUCCAUUCCUGA | Cleavage |
| gra-miR8674c | Gorai.002G049400 | 5 | 1 | 24 | 104 | 127 | AAGGGAUACAGGAUGAUGUGGCAU | AUUCCACAUUGUCGAGCAUUUCUU | Translation |
| gra-miR8771c | Gorai.002G049400 | 5 | 1 | 24 | 373 | 396 | UAGGGAGGUAACGAAGCUUAACGG | GGAUUGAGCUUUCUUUCUUCUUUG | Translation |
| gra-miR8784 | Gorai.002G049400 | 4.5 | 1 | 24 | 297 | 320 | UUUGUCGACAUGUCAGGAAAGCGC | GUCCAUUCCUGACAAUUUGGGAAA | Translation |
| gra-miR7504k | Gorai.002G051100 | 4 | 1 | 24 | 1380 | 1403 | UUUCUCCUGAUUUUUAGCAUUUUU | UAUAUUGCAAAAUAGUAGGAGGAA | Translation |
| gra-miR7504l | Gorai.002G051100 | 4 | 1 | 24 | 1380 | 1403 | UUUCUCCUGAUUUUUAGCAUUUUU | UAUAUUGCAAAAUAGUAGGAGGAA | Translation |
| gra-miR7504m | Gorai.002G051100 | 4 | 1 | 24 | 1380 | 1403 | UUUCUCCUGAUUUUUAGCAUUUUU | UAUAUUGCAAAAUAGUAGGAGGAA | Translation |
| gra-miR8665 | Gorai.002G051100 | 4.5 | 1 | 24 | 268 | 291 | UUAAUUAUUAUAUAGAUCAAGGAU | GUUCUUGACAUGUCUAAUAAUUAC | Translation |
| gra-miR8710a | Gorai.002G051100 | 4.5 | 1 | 20 | 2025 | 2044 | AUACAUGAACUUUGGUCCAA | UUCGACAAAAGGUGAUGUAU | Translation |
| gra-miR8710b | Gorai.002G051100 | 4.5 | 1 | 20 | 2025 | 2044 | AUACAUGAACUUUGGUCCAA | UUCGACAAAAGGUGAUGUAU | Translation |
| gra-miR7504g | Gorai.002G051300 | 4.5 | 1 | 24 | 1602 | 1625 | AGGAGGAAAUCUGAUUUGUCAUUC | UCUAAACAAAUUGGCUUUCUUGUU | Translation |
| gra-miR8719 | Gorai.002G051300 | 0 | 1 | 24 | 337 | 360 | CAAAUUGGAUAACUGGACAGGUAA | UUACCUGUCCAGUUAUCCAAUUUG | Cleavage |
| gra-miR8723b | Gorai.002G051300 | 4 | 1 | 24 | 3056 | 3079 | CCAUUAACGGUGUAACAGUAAGCU | AAGAGAUUGUUACACAGUUAAAGA | Translation |
| gra-miR8735 | Gorai.002G051800 | 3 | 1 | 24 | 208 | 231 | GGGGACAAUACCUUCGAUUGUUGG | UAUGGAAUCGAAGGAAUUGUUUCG | Translation |
| gra-miR8777 | Gorai.002G051800 | 4 | 1 | 20 | 255 | 274 | UUUCCAAUAGAAGAAUGACA | UGGUAUUCUUUUGAUGGAAA | Cleavage |
| gra-miR7486e | Gorai.002G052200 | 5 | 1 | 24 | 240 | 263 | CGACUUGCUGACGUGGAAGGAAAU | GAUUACAAUCAUGUCAGUAAGUUA | Cleavage |
| gra-miR8673 | Gorai.002G052200 | 5 | 1 | 24 | 439 | 462 | AAGAUAUGUAAACCUUGAGGGCUA | AUAUCUUCAGGGUUUCCAAGUCUG | Translation |
| gra-miR8751a | Gorai.002G052200 | 4 | 1 | 24 | 55 | 78 | UGAAAUUUGUAGAGACAAAACGCU | AUCCUUUUGUCUGUUCAAGUUCCA | Translation |
| gra-miR8762e | Gorai.002G052200 | 3.5 | 1 | 24 | 245 | 267 | UUUUUAACUUUACUGACAUGGCAU | CAAUCAUGUCAGUAA-GUUACAAA | Translation |
| gra-miR8681 | Gorai.002G052300 | 4.5 | 1 | 22 | 185 | 206 | ACAUUGUUGAGGGUCUAAUCGG | AUUGUGGGAACCUCAAAAAUGU | Cleavage |
| gra-miR8702 | Gorai.002G064300 | 4 | 1 | 24 | 485 | 507 | AGGUAUUGUCUCUGGGGAAGGGUU | AUGACUUCACUGGA-ACAAUACCU | Translation |
| gra-miR8674a | Gorai.002G067900 | 4 | 1 | 24 | 1293 | 1316 | UUAGAAAGGGACCAUGGAUGAUGU | AAAUGACCCAAGCUCUCUUUCUAG | Cleavage |
| gra-miR8699 | Gorai.002G067900 | 4.5 | 1 | 24 | 185 | 208 | AGGGCCAUUUUGACAAAACAUGCA | UUUCUGUUUUGUCACAAUGCCGUU | Translation |
| gra-miR482c | Gorai.002G087300 | 4.5 | 1 | 22 | 260 | 281 | UUCCCAAAACCUCCAAUUCCAA | UUGGUGAAGGGGGUUUUGGGAG | Cleavage |
| gra-miR8711 | Gorai.002G087300 | 4.5 | 1 | 23 | 1 | 23 | AUACUACACUAAGGGCACUAGAU | AUGAAUUGCUUUUCGUGUUGUAU | Translation |
| gra-miR8764 | Gorai.002G087300 | 3.5 | 1 | 21 | 174 | 193 | UUAGAUUGCAUUUUACCCCUU | AAGGGGUAAAA-GCAAUAUAA | Translation |
| gra-miR477 | Gorai.002G100600 | 4 | 1 | 21 | 1452 | 1472 | CGAAGUCUUGGAAGAGAGUAA | CAACUUUAAUCCAAGACUUGG | Cleavage |
| gra-miR8677 | Gorai.002G100600 | 4.5 | 1 | 21 | 704 | 724 | AAUGAAUCUAGGUUCUCUCUU | AAGGGAGUACUGAAGUUCAUU | Translation |
| gra-miR8680 | Gorai.002G100600 | 5 | 1 | 21 | 1341 | 1361 | ACAGUGGAGGUAUUGUGCCUG | UAGGCAAAAUAUUGCUAUUGG | Cleavage |
| gra-miR8704 | Gorai.002G100600 | 4 | 1 | 24 | 542 | 565 | AGUCAGUUCAGGCAGUCAGACCGU | AUUUGAUUACUGCUUGGAUUGAUU | Cleavage |
| gra-miR8751b | Gorai.002G100600 | 4 | 1 | 24 | 239 | 262 | UGAAAUUUGUAGAGAGAUAACGCU | CCGCUUCUUUCUCAACAAGUUUCU | Translation |
| gra-miR8774 | Gorai.002G102000 | 3 | 1 | 24 | 1173 | 1196 | UUGGAUUUUGAUUCAUAGAUUCGU | UCGCUUCUUUUCAUCAAAAUCCAA | Cleavage |
| gra-miR5741 | Gorai.002G103300 | 3.5 | 1 | 21 | 2158 | 2178 | UAGUAUAAGGACUAAAUUGGU | GGCAGUGCAGUUCUUGUACUA | Cleavage |
| gra-miR166c | Gorai.002G114100 | 5 | 1 | 21 | 811 | 831 | UAUAUGAUCUCGGACCAGGCU | AUCCAAGUUCGUGAUCAUAAA | Translation |
| gra-miR7484f | Gorai.002G114100 | 5 | 1 | 21 | 509 | 529 | UAUCUAACGUGUAGGGACUAA | AUCCUCCCUCUACGCUAGAUA | Cleavage |
| gra-miR7492n | Gorai.002G114100 | 3.5 | 1 | 24 | 1592 | 1615 | UAUAGAUCAGGGUCUUUAGCGGCG | GUAGCUUAAAUGACCUGAUCUAUG | Cleavage |
| gra-miR8653b | Gorai.002G114100 | 4.5 | 1 | 21 | 377 | 397 | UUCAAACUUAUUUUACGGCCA | GCGCUGAAGAAUAUGUUAGAA | Cleavage |
| gra-miR8679 | Gorai.002G114100 | 5 | 1 | 24 | 843 | 866 | ACAAGCGAGUUAAGGAUGUGACAA | UCUCCCCAUCUUUGGCUGGCUUGA | Cleavage |
| gra-miR8692 | Gorai.002G114100 | 5 | 1 | 23 | 784 | 807 | AGCAGGUCGC-GCUGACGUGGACA | UUGCCAUGUCAGAAGAGACCUGUU | Translation |
| gra-miR8718 | Gorai.002G114100 | 3.5 | 1 | 21 | 2605 | 2625 | AUUUUGGAAGAAUUUCAGCUG | GAGGAGAAAUUCUUCCAGAAA | Cleavage |
| gra-miR8745 | Gorai.002G114100 | 5 | 1 | 21 | 660 | 680 | UCAACGGAGUUGGGAGACAAA | UUAUUCUCCAAACUCUGCUGA | Cleavage |
| gra-miR8763 | Gorai.002G114100 | 4 | 1 | 23 | 2416 | 2438 | UUAAUACUGUUAAAUUUGUUGGU | AGAUACAAAUUUGAUAGUGUUCG | Cleavage |
| gra-miR8657a | Gorai.002G131000 | 3.5 | 1 | 24 | 2820 | 2843 | UGUAGUAAUUGUAGAAGUUCAGGG | UCCUGAACUGCUAUUGUUGCUACA | Translation |
| gra-miR8657b | Gorai.002G131000 | 3.5 | 1 | 24 | 2820 | 2843 | UGUAGUAAUUGUAGAAGUUCAGGG | UCCUGAACUGCUAUUGUUGCUACA | Translation |
| gra-miR8657c | Gorai.002G131000 | 3.5 | 1 | 24 | 2820 | 2843 | UGUAGUAAUUGUAGAAGUUCAGGG | UCCUGAACUGCUAUUGUUGCUACA | Translation |
| gra-miR8657d | Gorai.002G131000 | 3.5 | 1 | 24 | 2820 | 2843 | UGUAGUAAUUGUAGAAGUUCAGGG | UCCUGAACUGCUAUUGUUGCUACA | Translation |
| gra-miR8657e | Gorai.002G131000 | 3.5 | 1 | 24 | 2820 | 2843 | UGUAGUAAUUGUAGAAGUUCAGGG | UCCUGAACUGCUAUUGUUGCUACA | Translation |
| gra-miR5207 | Gorai.002G133000 | 5 | 1 | 24 | 1788 | 1810 | CUUAAGGUGGGUUUGGAUGGGCGA | UCUCUCAUC-AAACCAACUUUCAG | Translation |
| gra-miR8634 | Gorai.002G133000 | 4 | 1 | 21 | 108 | 128 | UUGGUAUGGAGGAUGGAAAAG | GCUUUUCAUUUUAUAUGUCAA | Translation |
| gra-miR8709b | Gorai.002G133000 | 2.5 | 1 | 24 | 1190 | 1213 | UCAUGUAUAAUUUUGAGAUUUGUC | AAGUGCUCUCGAAAUUGUACAUGG | Cleavage |
| gra-miR8729 | Gorai.002G133000 | 3.5 | 1 | 21 | 1266 | 1286 | CUAAAAUCGAGCAUAGACAUC | CUUGACUUUGCUUAAUUUUAG | Cleavage |
| gra-miR8748 | Gorai.002G133000 | 4 | 1 | 24 | 126 | 149 | UCGGUGGAGAUGGAUAAAAUGAAU | CAAAUGUUUAUUUGUUUCCAUUGA | Cleavage |
| gra-miR8765 | Gorai.002G133000 | 4.5 | 1 | 21 | 2664 | 2684 | UUAGUGGAGCUCAUGCUAGAA | ACCUUCCAUUAGCUCCACGAA | Cleavage |
| gra-miR8787 | Gorai.002G133000 | 3.5 | 1 | 23 | 1918 | 1940 | UUUUCUUUUAAUUGGACGAGAUA | UCAAGCGUCCAUUUGGAAGGAAA | Cleavage |
| gra-miR7484g | Gorai.002G134400 | 4 | 1 | 24 | 465 | 488 | UUCUUAUAUGUUAGAUCAAAGAGC | AACCCUUGAUUUAUCUUAUAACAA | Translation |
| gra-miR7486h | Gorai.002G134400 | 4 | 1 | 24 | 1109 | 1131 | CAGCAACUCGCGCUGACGUGGACA | UGAGAGCGUCGGCG-GAGUUGCUU | Translation |
| gra-miR7493b | Gorai.002G134400 | 4.5 | 1 | 24 | 470 | 493 | UUGGAUUGUUAAAAGGUUAAUUGU | UUGAUUUAUCUUAUAACAAUCUCA | Cleavage |
| gra-miR8638 | Gorai.002G134400 | 4.5 | 1 | 21 | 566 | 586 | UGAAUACAGGAAUGGCUCUCU | AUGGAACCAUUCCUCCAUUCA | Cleavage |
| gra-miR8669 | Gorai.002G134400 | 4 | 1 | 24 | 660 | 683 | AAAGACGAAAGACAAAAUCUCAAU | GUUACGAUUUGGUUUCUCUUCUUU | Translation |
| gra-miR8683 | Gorai.002G134400 | 5 | 1 | 24 | 124 | 147 | AGAACUCAUAACACAUUUAGAUAA | GAAGCUAAAGCUCUUCUGGGUUUU | Translation |
| gra-miR8690 | Gorai.002G134400 | 4.5 | 1 | 24 | 655 | 678 | AGAGUGACUACUUCGUAACAAAAC | ACCUUGUUACGAUUUGGUUUCUCU | Translation |
| gra-miR8739 | Gorai.002G134400 | 5 | 1 | 24 | 651 | 674 | UAACUAAAUAGUGACACGUGGCAU | CCCAACCUUGUUACGAUUUGGUUU | Translation |
| gra-miR8643a | Gorai.002G163100 | 3 | 1 | 21 | 557 | 577 | ACAUAUUAAGAAGUCGAAUUG | AAGUUCGAUUUGUUAAUAUGG | Translation |
| gra-miR8643b | Gorai.002G163100 | 3 | 1 | 21 | 557 | 577 | ACAUAUUAAGAAGUCGAAUUG | AAGUUCGAUUUGUUAAUAUGG | Translation |
| gra-miR8664 | Gorai.002G163100 | 5 | 1 | 23 | 1954 | 1976 | UGGAGUCAACGGUGGGACGGAGA | GAUUUGUCCCAUGGUUUACUCGA | Translation |
| gra-miR8755 | Gorai.002G163100 | 5 | 1 | 24 | 2137 | 2160 | UGGACGCGCUUUGCUGACGUGGCA | AAUGCUGUUCGCAGAGCUCGUUCG | Cleavage |
| gra-miR7492l | Gorai.002G224000 | 4 | 1 | 24 | 544 | 567 | CUAUAGAACAUGACCUUUAGCAGC | AUUUCAGGAGGUCAUGAUUUAUGG | Cleavage |
| gra-miR7492m | Gorai.002G224000 | 4 | 1 | 24 | 544 | 567 | CUAUAGAACAUGACCUUUAGCAGC | AUUUCAGGAGGUCAUGAUUUAUGG | Cleavage |
| gra-miR8671 | Gorai.002G224000 | 4.5 | 1 | 24 | 116 | 139 | AACUGUUCGUGAUAAGAUGUCGGU | UAAAGCAGCUUAUCUUGAGCAAUU | Translation |
| gra-miR482 | Gorai.002G224100 | 4 | 1 | 22 | 879 | 900 | UCUUUCCAAUUCCUCCCAUUCC | CAAAAAGGAUGAUUUGGAAAGA | Translation |
| gra-miR8717 | Gorai.002G224100 | 4.5 | 1 | 24 | 1263 | 1286 | AUUGGUUGUUCUGAUUCGAGGCUA | GAAAGGUGAAUCAAAUCAACCAAA | Translation |
| gra-miR530b | Gorai.002G229400 | 5 | 1 | 21 | 622 | 642 | AGGUGCAGGUGCAGGCGCAGC | GCUGCACAUCAACCUGCAUUU | Translation |
| gra-miR8706a | Gorai.002G229400 | 4 | 1 | 24 | 1288 | 1311 | AGUUUUAGGAUUGAUUUGAUGAAA | CACACUCAAAACUUUCCUGAAGCU | Translation |
| gra-miR8706b | Gorai.002G229400 | 4 | 1 | 24 | 1288 | 1311 | AGUUUUAGGAUUGAUUUGAUGAAA | CACACUCAAAACUUUCCUGAAGCU | Translation |
| gra-miR8715 | Gorai.002G229400 | 5 | 1 | 24 | 793 | 816 | AUGGGCUGGCACAUGGGCGUGUGG | AGACACUCCCAUUUGCAACCUCAU | Cleavage |
| gra-miR8772 | Gorai.002G229400 | 5 | 1 | 21 | 1523 | 1543 | UUGGACUGUGGCUACAUAUAG | AAACAUGUAGUCAUAAUGCAA | Cleavage |
| gra-miR8642 | Gorai.002G260200 | 4.5 | 1 | 24 | 1131 | 1154 | UGAUCAAAACAGGAACGAAUUCAA | CAGCAUUCCUUCAAGUCUUGGUCA | Translation |
| gra-miR8746 | Gorai.002G260200 | 4.5 | 1 | 21 | 2101 | 2121 | UCCAUAUUUCACUAUCUCUUA | UACGAGUUCAUGGAAUAUGGA | Cleavage |
| gra-miR8771d | Gorai.002G260200 | 4.5 | 1 | 21 | 2255 | 2275 | UGCCAUGUAGGAUUGUCGUUA | AGACGACAAUCAUUCAUUGUG | Translation |
| gra-miR7502e | Gorai.007G017900 | 5 | 1 | 21 | 48 | 68 | UUAACGGUAGAAAUGGAUGAA | CCCAUCCAUUUCUUCCUUUUU | Cleavage |
| gra-miR8732 | Gorai.007G017900 | 5 | 1 | 24 | 64 | 87 | GAAGAGUAUAGGGACUUAUGGCAU | UUUUUAUUAUUACCAACACUCUUC | Translation |
| gra-miR1446 | Gorai.007G020100 | 4.5 | 1 | 21 | 1997 | 2017 | AACUCUCUCCCUCAAAGGCUA | CAGCUUCUGAGAGGGAGCGUU | Translation |
| gra-miR164a | Gorai.007G020100 | 5 | 1 | 21 | 1189 | 1209 | CAUGUGCCUUGGCUCUCCAUC | UUUGGAGGACCAAGGAGCGUU | Cleavage |
| gra-miR8636 | Gorai.007G020100 | 5 | 1 | 21 | 278 | 297 | CGGACCCUCUAACAGUGGAGG | CCUUCA-UGUCAGAGGGUUCU | Translation |
| gra-miR8663a | Gorai.007G020100 | 3.5 | 1 | 24 | 1472 | 1495 | UUUGAACUUGGCAACUUUUUUCAC | AUGAGAAAGUUUGCCAAGUUCGUA | Cleavage |
| gra-miR8667 | Gorai.007G020100 | 4.5 | 1 | 24 | 611 | 634 | UUUCCAAUAGUUUUAUGCCACAUC | CAUUUGGCAUAACAGCAUUGGAGU | Translation |
| gra-miR8654a | Gorai.007G029800 | 4 | 1 | 24 | 1547 | 1570 | AAGGAUACUACUUUGAUGGAGAAA | UUUUUCAGUUAAAGUGGUAUGCUU | Cleavage |
| gra-miR8654b | Gorai.007G029800 | 4 | 1 | 24 | 1547 | 1570 | AAGGAUACUACUUUGAUGGAGAAA | UUUUUCAGUUAAAGUGGUAUGCUU | Cleavage |
| gra-miR8654c | Gorai.007G029800 | 4 | 1 | 24 | 1547 | 1570 | AAGGAUACUACUUUGAUGGAGAAA | UUUUUCAGUUAAAGUGGUAUGCUU | Cleavage |
| gra-miR8743a | Gorai.007G029800 | 4 | 1 | 24 | 1739 | 1762 | UAUGAAAAGUUAUAAAAUGGUCAU | CGGGAUAUGAUGUAACUUUUCAUC | Cleavage |
| gra-miR8743c | Gorai.007G029800 | 3.5 | 1 | 24 | 1739 | 1762 | UAUGAAAAGUUACAAAAUGGUCAU | CGGGAUAUGAUGUAACUUUUCAUC | Cleavage |
| gra-miR8743d | Gorai.007G029800 | 3.5 | 1 | 24 | 1739 | 1762 | UAUGAAAAGUUACAAAAUGGUCAU | CGGGAUAUGAUGUAACUUUUCAUC | Cleavage |
| gra-miR8743e | Gorai.007G029800 | 3.5 | 1 | 24 | 1739 | 1762 | UAUGAAAAGUUACAAAAUGGUCAU | CGGGAUAUGAUGUAACUUUUCAUC | Cleavage |
| gra-miR8782 | Gorai.007G029800 | 4 | 1 | 21 | 1223 | 1243 | UUUGGUGUUGAAGGGGAAUAA | CUAUUUCUCUUCAGGACCAGG | Cleavage |
| gra-miR8672 | Gorai.007G038800 | 3.5 | 1 | 24 | 1949 | 1972 | AAGAGAAAUGAUUGUAUGAAACAG | AUUUGUCAUACAAUAACUUUUCUG | Translation |
| gra-miR8700 | Gorai.007G038800 | 4.5 | 1 | 24 | 2217 | 2240 | AGGGCGACAACGGUUACUGUGAUU | UCUCACACUAACUGCUCUCGCUUU | Translation |
| gra-miR8708 | Gorai.007G038800 | 5 | 1 | 23 | 312 | 334 | AGGAGGAGUUAUGGAUAGUUUUA | GGAAAUUUUCCAUAAUUUCUCAG | Cleavage |
| gra-miR172a | Gorai.007G059900 | 4 | 1 | 21 | 936 | 956 | GCGGCAUUAUCAAGAUUCACA | CAUGGAUCUUGAUGAUGAUGA | Cleavage |
| gra-miR172b | Gorai.007G059900 | 3.5 | 1 | 21 | 936 | 956 | GCAGCAUUAUCAAGAUUCACA | CAUGGAUCUUGAUGAUGAUGA | Cleavage |
| gra-miR157a | Gorai.007G063800 | 3.5 | 1 | 21 | 288 | 308 | UUGACAGAAGAUAGAGAGCAC | UAAUUUUCUCUCUUCUGUUAA | Cleavage |
| gra-miR157b | Gorai.007G063800 | 3.5 | 1 | 21 | 288 | 308 | UUGACAGAAGAUAGAGAGCAC | UAAUUUUCUCUCUUCUGUUAA | Cleavage |
| gra-miR167a | Gorai.007G063800 | 5 | 1 | 21 | 535 | 556 | UCAGAUCAU-CUUGCAGCUUCA | UUGGGCUCCAAGGAUGAUUUGG | Translation |
| gra-miR167b | Gorai.007G063800 | 5 | 1 | 21 | 535 | 556 | UCAGAUCAU-CUUGCAGCUUCA | UUGGGCUCCAAGGAUGAUUUGG | Translation |
| gra-miR8635 | Gorai.007G063800 | 4.5 | 1 | 21 | 177 | 197 | UCGGAUCUUCAAACGGUGGAG | UUCCAUCGUUUGGAAAGCUGA | Cleavage |
| gra-miR8695 | Gorai.007G063800 | 4 | 1 | 21 | 390 | 410 | AGGAUGUAAAAGAAUAGGUGA | AAACCUAGCCUCUUACAUCCG | Translation |
| gra-miR8698 | Gorai.007G063800 | 4 | 1 | 24 | 342 | 365 | AGGGACAAUUAACUUUAACGGUCA | ACAGUCUGAAAGUUGUUUGUUCCU | Translation |
| gra-miR8758 | Gorai.007G063800 | 3 | 1 | 24 | 571 | 594 | UGGGCUUCUUGCAAGAUGAAGGUA | GAUUUUGGUCUUUCAAGAAGCCUA | Cleavage |
| gra-miR8694a | Gorai.007G076300 | 4.5 | 1 | 24 | 1879 | 1902 | AGGAUGCACUGUCAGCAAAAGUAU | GACUUUUUGCAGAUAGCGCACUCU | Cleavage |
| gra-miR8694b | Gorai.007G076300 | 4.5 | 1 | 24 | 1879 | 1902 | AGGAUGCACUGUCAGCAAAAGUAU | GACUUUUUGCAGAUAGCGCACUCU | Cleavage |
| gra-miR8756 | Gorai.007G076300 | 4.5 | 1 | 24 | 1273 | 1296 | UGGACUGUUAAAAUUUUAAUGGCA | GAUGAUGAGGAUGUAAACAGUCCG | Translation |
| gra-miR8780 | Gorai.007G076300 | 4.5 | 1 | 24 | 1329 | 1352 | UUUGAUGAUGUGGCAACAAAGCGC | GCCAUUUGUUAUAAAGUCAUCAAG | Translation |
| gra-miR7484l | Gorai.007G078700 | 4.5 | 1 | 23 | 392 | 414 | UUUGAUCUAAUGUAUGGAGACUA | GUGUCUUCAAAGGUUGGAUUGAA | Cleavage |
| gra-miR8684 | Gorai.007G078700 | 4 | 1 | 21 | 205 | 224 | AGAAUGACUGGUUUACUCUUU | GGAGA-UCAACCAGUUGUUCU | Cleavage |
| gra-miR8645 | Gorai.007G102400 | 4 | 1 | 22 | 317 | 338 | UUGGUACCUGAACUUGACGUCU | GGCCGACGAGUGCAGGUGCCAC | Translation |
| gra-miR7492g | Gorai.007G114000 | 5 | 1 | 21 | 1736 | 1756 | CGUGAUCUUUAGCGGCGUUUG | UUAUCGUUGCUUAUGAUCGUG | Translation |
| gra-miR7492h | Gorai.007G114000 | 5 | 1 | 21 | 1736 | 1756 | CGUGAUCUUUAGCGGCGUUUG | UUAUCGUUGCUUAUGAUCGUG | Translation |
| gra-miR7492i | Gorai.007G114000 | 5 | 1 | 21 | 1736 | 1756 | CGUGAUCUUUAGCGGCGUUUG | UUAUCGUUGCUUAUGAUCGUG | Translation |
| gra-miR7492j | Gorai.007G114000 | 5 | 1 | 21 | 1736 | 1756 | CGUGAUCUUUAGCGGCGUUUG | UUAUCGUUGCUUAUGAUCGUG | Translation |
| gra-miR7492k | Gorai.007G114000 | 5 | 1 | 21 | 1736 | 1756 | CGUGAUCUUUAGCGGCGUUUG | UUAUCGUUGCUUAUGAUCGUG | Translation |
| gra-miR8721a | Gorai.007G114000 | 4 | 1 | 21 | 1772 | 1792 | CAUCGAUAGUUUGAGGAUGUA | GUCAUCUUCGAGAUAUGGAUG | Translation |
| gra-miR8721b | Gorai.007G114000 | 4 | 1 | 21 | 1772 | 1792 | CAUCGAUAGUUUGAGGAUGUA | GUCAUCUUCGAGAUAUGGAUG | Translation |
| gra-miR167c | Gorai.007G133100 | 5 | 1 | 22 | 250 | 271 | UCAGAUGAAGCUGCCAGCAUGA | UCGUGUUGGCAGUCUUAUCAGU | Translation |
| gra-miR7494b | Gorai.007G133100 | 4 | 1 | 23 | 18 | 40 | AGAGGGAGAAGCAGAAGAGAAUA | UCUUCUCUUCUUCCUCUUCUUCA | Translation |
| gra-miR8725 | Gorai.007G133100 | 4 | 1 | 24 | 1790 | 1813 | CCUGACUAGAGACAAUACCAACCU | UAAGCAGUAAUGGCUCUAGUCAGC | Cleavage |
| gra-miR7484h | Gorai.007G147700 | 4.5 | 1 | 21 | 1300 | 1320 | UUUAACCGUAGAAAUGGAUGA | GCAUUUAUUCCUGAGGUUAAU | Cleavage |
| gra-miR7484i | Gorai.007G147700 | 4.5 | 1 | 21 | 1300 | 1320 | UUUAACCGUAGAAAUGGAUGA | GCAUUUAUUCCUGAGGUUAAU | Cleavage |
| gra-miR7484e | Gorai.007G148900 | 4.5 | 1 | 21 | 2392 | 2412 | AUUUAAUGUAUAGGGACUAAU | AUUAGUCUCAAUUCAUUUGAU | Translation |
| gra-miR7484o | Gorai.007G148900 | 5 | 1 | 21 | 917 | 937 | GAUUUAACGUAUAGGGACUAA | AGAUUCCAUCUUCGUUAGGUC | Translation |
| gra-miR7494c | Gorai.007G148900 | 4.5 | 1 | 24 | 41 | 64 | AUGGAGGAAAACAGAGGGAGAAGC | UUGUUUUGCUUUCUUUACUUCCAU | Cleavage |
| gra-miR8646 | Gorai.007G148900 | 3 | 1 | 21 | 734 | 754 | UAGUGAGGAUGGGAAAUUUGU | UUGAAUUUCUCAAUCUCACUG | Translation |
| gra-miR8701 | Gorai.007G148900 | 4.5 | 1 | 21 | 780 | 800 | AGGGGCUUAGAAAGAUGGGAC | UUCCAAUAUUUCUAAGCUUUC | Cleavage |
| gra-miR8713 | Gorai.007G148900 | 4 | 1 | 24 | 3404 | 3427 | AUGACUGUUUUAAUGAAGAUUGCG | CCCUAUCAUCAGUAAAACUGUUAU | Cleavage |
| gra-miR8743b | Gorai.007G148900 | 4 | 1 | 24 | 781 | 804 | UUUGGAAAGUUAUAAAAUGGUCAU | UCCAAUAUUUCUAAGCUUUCCAAA | Cleavage |
| gra-miR8768 | Gorai.007G148900 | 4.5 | 1 | 21 | 2738 | 2757 | UUCCAUGUCACAGAGAUGUUG | UUACAU-UCGGUGACAUUGAA | Cleavage |
| gra-miR8647 | Gorai.007G153700 | 4.5 | 1 | 21 | 785 | 805 | ACCGAUUUGCUCUUUGAUCUA | AGUAUCAAAGAACAGGUCAGU | Translation |
| gra-miR8759 | Gorai.007G153700 | 3 | 1 | 21 | 44 | 64 | UGGUGGAAGUAUUGUGCCCGG | AAAGGCAAAAUAGUUCCACCA | Translation |
| gra-miR8651 | Gorai.007G157300 | 4 | 1 | 24 | 785 | 808 | UUAAUGGAUCAUAACAGCAGGUAU | AACUUUGUUCAUGGGAUCCAUUAA | Translation |
| gra-miR8658 | Gorai.007G167300 | 4 | 1 | 21 | 193 | 213 | UUUGAAAAGUACAGGGACUAU | GAAGACCCUGUGCUUAUCAAU | Cleavage |
| gra-miR7504c | Gorai.007G175900 | 3.5 | 1 | 24 | 494 | 517 | AAGAGAAAAAAUCGGAUUUAUCAU | AAGAAAAAUCCGAUGUCUUCUCAU | Translation |
| gra-miR8736 | Gorai.007G175900 | 3.5 | 1 | 24 | 115 | 138 | GUGGAACGUGUUAAGAGAGGAAUA | CUCGUCUCUCUUAUCGGGUUCUGC | Translation |
| gra-miR8663b | Gorai.007G182500 | 4 | 1 | 23 | 655 | 677 | UGAGGCAUGAACUUGGCAAUUUU | UUGAUUUAUGAAUUCAUGCCUCA | Cleavage |
| gra-miR8727 | Gorai.007G182500 | 4.5 | 1 | 23 | 167 | 189 | CGGACUCUCAAACAGUGGAGGUA | GUCUUCCACUGGUUCUGAGUUCC | Translation |
| gra-miR8655 | Gorai.007G182700 | 4.5 | 1 | 21 | 365 | 385 | AUAUGUUCUGAUUAUAUCUGU | ACGGGGAUAGUCAGGAUAUAA | Cleavage |
| gra-miR8678 | Gorai.007G182700 | 4 | 1 | 21 | 1060 | 1080 | AAUUUGGACUGUCACGUAGGA | CGUUUUGUGGCAGUCAAAAUU | Cleavage |
| gra-miR8716 | Gorai.007G182700 | 4.5 | 1 | 24 | 1355 | 1378 | AUGUGUCAAAAUGUGAGGCUGUCA | CAAGGAUCUUACAUUUCGACAUAA | Cleavage |
| gra-miR8744 | Gorai.007G182700 | 4.5 | 1 | 24 | 1161 | 1184 | UCAAAAAAUGGGCAAAGUAGUCAU | GAGUCUACUUGGCUUUUGUUUUGA | Translation |
| gra-miR8762d | Gorai.007G182700 | 2.5 | 1 | 24 | 1255 | 1278 | UUGUUAACUUUGAUGAUGUGGCAU | AGAUUGCAUCAUCAAAGUUGUCAA | Cleavage |
| gra-miR8769 | Gorai.007G182700 | 4.5 | 1 | 24 | 1871 | 1894 | UUGAACUUUGACCGGAUCUAGGGA | CUGUAAGAUCUCCUAAAAGUUUAG | Translation |
| gra-miR7502f | Gorai.007G182900 | 4 | 1 | 21 | 238 | 258 | UUUAGCAGUAGAAAUAGAUGA | ACAUCUAUUUCUAUUCCAAGA | Cleavage |
| gra-miR8641 | Gorai.007G182900 | 4.5 | 1 | 24 | 78 | 101 | UUUUUACUUUGGGACACUGAUGGC | GGUUGCUGUUUCACAAAGUAAUAA | Cleavage |
| gra-miR8720 | Gorai.007G182900 | 3.5 | 1 | 24 | 903 | 926 | CAGUGUAGUUCUAAACCCGUCGGG | ACAUCCUGGUUUGGAGCUUCACUG | Cleavage |
| gra-miR7486f | Gorai.007G183100 | 4.5 | 1 | 24 | 1252 | 1275 | CGCUUUGCUGACGUGGAAACAAAU | AGAACUUCUCACGUCAACAUAGUG | Cleavage |
| gra-miR7486g | Gorai.007G183100 | 4.5 | 1 | 24 | 1252 | 1275 | CGCUUUGCUGACGUGGAAACAAAU | AGAACUUCUCACGUCAACAUAGUG | Cleavage |
| gra-miR7494e | Gorai.007G183100 | 4.5 | 1 | 21 | 306 | 325 | UCGUGAUCUUUAGCGGUGUUU | UCAUAUU-CUAAAGAUUGCGA | Cleavage |
| gra-miR7494f | Gorai.007G183100 | 4.5 | 1 | 21 | 306 | 325 | UCGUGAUCUUUAGCGGUGUUU | UCAUAUU-CUAAAGAUUGCGA | Cleavage |
| gra-miR8767a | Gorai.007G183200 | 4 | 1 | 21 | 420 | 440 | UUCAACUCUGCCAAGCAAUUG | GAAUUCUUUGUUGGGGUUGAA | Translation |
| gra-miR8767b | Gorai.007G183200 | 4 | 1 | 21 | 420 | 440 | UUCAACUCUGCCAAGCAAUUG | GAAUUCUUUGUUGGGGUUGAA | Translation |
| gra-miR8709c | Gorai.007G183600 | 5 | 1 | 20 | 870 | 890 | AUACAUGAA-CUUCGAUUUAA | UGGAAUCGGAGCUUUAUGUGU | Translation |
| gra-miR8778 | Gorai.007G183600 | 4.5 | 1 | 24 | 135 | 158 | UUUCCAUAUUAGGGUUUGAACUUU | UGAUAGCAAGUUCAAAUGUGGGAA | Translation |
| gra-miR8786a | Gorai.007G183600 | 4 | 1 | 24 | 1619 | 1642 | UUUUAGUGAUGUGGCAGAAAGAUG | ACCAAUGCUACCACCUCACUGAGA | Translation |
| gra-miR8786b | Gorai.007G183600 | 4 | 1 | 24 | 1619 | 1642 | UUUUAGUGAUGUGGCAGAAAGAUG | ACCAAUGCUACCACCUCACUGAGA | Translation |
| gra-miR8685 | Gorai.007G183900 | 5 | 1 | 24 | 1299 | 1322 | AGACGACACUUCAAAGAUUUCUCC | AGGGAAAUUGUCUGACUGUCGUCU | Translation |
| gra-miR8760 | Gorai.007G183900 | 4.5 | 1 | 24 | 628 | 651 | UGUGACAUCGUCAAAUUCGGCCAU | GGUCCCGGCUUUGCCAGUGUUACA | Translation |
| gra-miR8688 | Gorai.007G184800 | 5 | 1 | 24 | 1153 | 1176 | AGAGGAUGCUUUAUAAAACUCAUA | GAACAGCUUCUUAAAGCAUCUGCU | Cleavage |
| gra-miR8693 | Gorai.007G184800 | 3.5 | 1 | 24 | 1706 | 1729 | AGGAUGAAAAUAUUGAUGUAGCAU | AGUUAACACCAAUAAAUUCAUCUU | Translation |
| gra-miR8723a | Gorai.007G184800 | 5 | 1 | 23 | 957 | 979 | UGUAACAGUAAGCUGACGUGACA | AUUCAUGUUCUCUUAUUGGUACA | Cleavage |
| gra-miR8738a | Gorai.007G184800 | 4.5 | 1 | 23 | 1690 | 1712 | GUUAACUUUAACGGUCAACGGUU | CAAAGUUCUCCAUUCGAGUUAAC | Translation |
| gra-miR8738b | Gorai.007G184800 | 4.5 | 1 | 23 | 1690 | 1712 | GUUAACUUUAACGGUCAACGGUU | CAAAGUUCUCCAUUCGAGUUAAC | Translation |
| gra-miR8775 | Gorai.007G186000 | 4 | 1 | 21 | 413 | 433 | UUGUGAGAUUGAAGCUGAUGG | UUAUAAGGCUUAAUCUCGCAA | Cleavage |
| gra-miR8644 | Gorai.007G196700 | 5 | 1 | 21 | 1857 | 1877 | UUAAACUCCAGAAGUAGGGCU | CUCUCGGCUUUUGCAGUUGAA | Cleavage |
| gra-miR8656 | Gorai.007G196700 | 3.5 | 1 | 21 | 575 | 595 | UGGAAAAGUGGUAAUAAGGGG | UCUCGUAUAACCAUUUUUCCG | Cleavage |
| gra-miR8670a | Gorai.007G196700 | 4.5 | 1 | 24 | 868 | 891 | AAAGUUGGGCCCCUGUUGGUGCGG | AUUGUUCAACUGGGGUUUAAUUUG | Cleavage |
| gra-miR8670b | Gorai.007G196700 | 4.5 | 1 | 24 | 868 | 891 | AAAGUUGGGCCCCUGUUGGUGCGG | AUUGUUCAACUGGGGUUUAAUUUG | Cleavage |
| gra-miR8757b | Gorai.007G196700 | 2.5 | 1 | 23 | 3188 | 3210 | UGGGUCGAGCUUAGGCAAGCAUA | CAGGGUUGCUUGAGCUUGACCCA | Cleavage |
| gra-miR7502d | Gorai.007G210100 | 3.5 | 1 | 24 | 513 | 536 | CUUUUAACAGUAGAAUUUGAUGGA | GCAACCGAAAUCUACUGUUGGAAC | Cleavage |
| gra-miR7504e | Gorai.007G214500 | 4 | 1 | 24 | 93 | 116 | AGGAGAAAAAAAUCUGAUUUGUCA | UGUAGGAGCAGCUUUUGUUCUCUU | Cleavage |
| gra-miR7504f | Gorai.007G214500 | 4 | 1 | 24 | 93 | 116 | AGGAGAAAAAAAUCUGAUUUGUCA | UGUAGGAGCAGCUUUUGUUCUCUU | Cleavage |
| gra-miR7505b | Gorai.007G216500 | 4 | 1 | 21 | 1851 | 1871 | ACAGCUUUAGAAAUCAUCCCU | UGGGAUGCUUACUGAAGUUGC | Translation |
| gra-miR8733 | Gorai.007G216500 | 3.5 | 1 | 21 | 1402 | 1422 | GAGCUUGGAAGUGCAUCCGGC | AACGGAAGCGUUUCCAAUCUC | Cleavage |
| gra-miR8749 | Gorai.007G216500 | 5 | 1 | 21 | 1306 | 1326 | UCUCGGACCCUCAACGGAAGG | GAUGCUGUUGGGGCGCUGAGA | Cleavage |
| gra-miR7484c | Gorai.007G236500 | 4.5 | 1 | 20 | 1444 | 1462 | AGAAGUCGAAUUGCAUUUUG | CAACGUGCAAUU-GAUUUUU | Cleavage |
| gra-miR8757a | Gorai.007G236500 | 4 | 1 | 23 | 1122 | 1144 | UGGGCCGAGCUUGGACAAGCAUA | UGAACCUGUUUUAGCUUGGCCCG | Cleavage |
| gra-miR7503b | Gorai.007G244000 | 4.5 | 1 | 24 | 471 | 494 | AACCGAUGGUUGAACAUGUUAGAC | GGGUAACAAGUUCGACGGUGGGUU | Cleavage |
| gra-miR8633 | Gorai.007G244000 | 4 | 1 | 22 | 1684 | 1705 | UAAGUGAAGAAAGAGGUAGGUU | GGCUUUCCUCUAUCUUCAUUUU | Translation |
| gra-miR8691 | Gorai.007G244000 | 3.5 | 1 | 24 | 18 | 41 | AGAUGAUGAGAAAGGAAAGUCAAG | UUUCGCUUUCUCUUCUUAUCUUCU | Cleavage |
| gra-miR8696 | Gorai.007G244000 | 5 | 1 | 24 | 346 | 369 | AGGCUCUAAUGUGGGAACGACUGC | CGGGUCGCACCCGCAUUGGGGUCG | Cleavage |
| gra-miR8714 | Gorai.007G244000 | 4.5 | 1 | 21 | 1691 | 1711 | AUGGACGAAAUGAAAGUAGAG | CUCUAUCUUCAUUUUCUCCAG | Cleavage |
| gra-miR8762a | Gorai.007G244000 | 3.5 | 1 | 24 | 577 | 599 | UUAACAUUUGUUAACUUUGCUGAC | UUCA-CUGAGUUAAGGAAUGUUGA | Translation |
| gra-miR8762b | Gorai.007G244000 | 4 | 1 | 24 | 576 | 599 | UUAACGUUUGUUAACUUUGUUGAU | AUUCACUGAGUUAAGGAAUGUUGA | Translation |
| gra-miR8762c | Gorai.007G244000 | 4 | 1 | 24 | 576 | 599 | UUAACGUUUGUUAACUUUGUUGAU | AUUCACUGAGUUAAGGAAUGUUGA | Translation |
| gra-miR8785 | Gorai.007G244000 | 4.5 | 1 | 21 | 1834 | 1854 | UUUUACAGCAGCUACAUCCAU | UCAGUUGUAGCUGCUGUAAUG | Cleavage |
| gra-miR7484d | Gorai.007G247600 | 5 | 1 | 21 | 862 | 882 | AGAAUGACCGGUUUGCUCUUU | GAAGAUCGGACUGUUUAUUCC | Cleavage |
| gra-miR7484m | Gorai.007G247600 | 4.5 | 1 | 21 | 2276 | 2296 | UUUGUAUGUUAGAUCGAAGAG | GACUUGGUUCUAAUGUGCAAC | Cleavage |
| gra-miR7486i | Gorai.007G247600 | 5 | 1 | 23 | 597 | 619 | GCUGACGUGGAAGGAAAUCGCUA | AUACGAUUUCUUUGUACAUCAAC | Translation |
| gra-miR8666 | Gorai.007G247600 | 5 | 1 | 21 | 636 | 656 | UUGGUGAUCAUAAGUACAUAA | UUUUGAACUUCUGGACACCAA | Translation |
| gra-miR7492d | Gorai.007G271300 | 5 | 1 | 24 | 1224 | 1247 | UGGGCUUAGAUUUUUUGCGGCGUU | CAUUCCUCAAAAACUUGGGGCCUA | Translation |
| gra-miR7504n | Gorai.007G271300 | 5 | 1 | 24 | 2288 | 2311 | AGGAUAAAAUUACUGAUGUGGCAU | UUUUAAUAGUAGUUAUUUUAUAUU | Translation |
| gra-miR8632 | Gorai.007G271300 | 4.5 | 1 | 21 | 2649 | 2670 | AUGAGCUAGAAG-UUGGAACUC | AGGUUCCAAUCUUCUACUUUAU | Cleavage |
| gra-miR8675a | Gorai.007G271300 | 5 | 1 | 24 | 35 | 59 | AAGGUGAUGACCUG-CUACAAUUUU | CGUUAUGUAGACUGGUCAUUGUUUU | Cleavage |
| gra-miR8740 | Gorai.007G271300 | 5 | 1 | 21 | 2776 | 2795 | UAAUGAUGUGGCACAAUAUUA | GCAUAUU-UGCAUCAUUAUUG | Translation |
| gra-miR8741 | Gorai.007G271300 | 4.5 | 1 | 21 | 47 | 67 | UAGCACUGAAGAUGAUGAUGG | UGGUCAUUGUUUUUAUUGUUA | Cleavage |
| gra-miR8742a | Gorai.007G271300 | 4.5 | 1 | 21 | 1013 | 1032 | UAUCUUAUUCAUCUUGGACUG | CAGUU-GAGUUGAGUAAGAUA | Cleavage |
| gra-miR8742b | Gorai.007G271300 | 4.5 | 1 | 21 | 1013 | 1032 | UAUCUUAUUCAUCUUGGACUG | CAGUU-GAGUUGAGUAAGAUA | Cleavage |
| gra-miR8761 | Gorai.007G271300 | 5 | 1 | 24 | 3269 | 3292 | UGUUGACGUUGCAUACAUGUGGAU | ACAGGCGUGAAUGCCACUUCGAUA | Translation |
| gra-miR8766 | Gorai.007G271300 | 4 | 1 | 24 | 1664 | 1687 | UUAUUUUGGAAUUAGAAAAGUCGU | CUGAGAUUUUUAAUUGCAAAAUGC | Translation |
| gra-miR7494d | Gorai.007G283900 | 5 | 1 | 20 | 781 | 800 | UCAUGGACUUUAGCGGCGUU | UAUGUUGUUAAAGUUCAUCU | Cleavage |
| gra-miR8686 | Gorai.007G283900 | 4 | 1 | 24 | 1289 | 1312 | AGAGAAUGUCAGUACUAGAGGCAG | GUAGAUCUAAUGCUGGUAUUCUUC | Cleavage |
| gra-miR8712 | Gorai.007G283900 | 4.5 | 1 | 24 | 915 | 938 | AUAUCAUUGGUGAUGUAUCGUCUU | GCGUCGAUCCUUCAGUAAUGAUAG | Translation |
| gra-miR8776a | Gorai.007G283900 | 5 | 1 | 24 | 924 | 948 | UUUCAAAGUCCUUGCA-UACUAUUU | CUUCAGUAAUGAUAGGACUUUGAAU | Cleavage |
| gra-miR8776b | Gorai.007G283900 | 5 | 1 | 24 | 924 | 948 | UUUCAAAGUCCUUGCA-UACUAUUU | CUUCAGUAAUGAUAGGACUUUGAAU | Cleavage |
| gra-miR8776c | Gorai.007G283900 | 5 | 1 | 24 | 924 | 948 | UUUCAAAGUCCUUGCA-UACUAUUU | CUUCAGUAAUGAUAGGACUUUGAAU | Cleavage |
| gra-miR8776d | Gorai.007G283900 | 5 | 1 | 24 | 924 | 948 | UUUCAAAGUCCUUGCA-UACUAUUU | CUUCAGUAAUGAUAGGACUUUGAAU | Cleavage |
| gra-miR8722 | Gorai.007G285300 | 4 | 1 | 22 | 1603 | 1624 | CAUGUUUUUCCUGUUCAUCUUC | UGGGAUCAGCACGAAAAUCAUG | Translation |
| gra-miR8734 | Gorai.007G285300 | 5 | 1 | 24 | 1264 | 1287 | GAUCAUAUCUCGUACGUUAGGACA | GUGACUAAAAUAGCCGAUAUGAUC | Translation |
| gra-miR8747 | Gorai.007G285300 | 4.5 | 1 | 24 | 1876 | 1899 | UCCCAGUUGUAGUUGGUCGUUCGG | CUUAGAGAUCAACAACAAUUAGGA | Translation |
| gra-miR8767c | Gorai.007G285300 | 4 | 1 | 21 | 1488 | 1508 | UUUUCAACUCUGCCAAGCAAU | AAUGCAUGGCCGGUUUGAAGA | Translation |
| gra-miR8771a | Gorai.007G285300 | 4 | 1 | 21 | 420 | 440 | GGAUUGUCGUUAGGGAGGUAA | UUAUCUCCAUAGCCAUGAUCC | Cleavage |
| gra-miR8771b | Gorai.007G285300 | 4 | 1 | 21 | 420 | 440 | GGAUUGUCGUUAGGGAGGUAA | UUAUCUCCAUAGCCAUGAUCC | Cleavage |
| gra-miR482d | Gorai.007G292000 | 4.5 | 1 | 22 | 918 | 939 | UUUCCUAUGCCCCCCAUUCCAC | AGGGAAAGGAGGACAUGGGAAU | Translation |
| gra-miR7504i | Gorai.007G292100 | 2.5 | 1 | 21 | 58 | 78 | AUAUGAAACUGAGAUACCAUG | AUCGGUAUUUCAGCUUCAUAU | Cleavage |
| gra-miR7504j | Gorai.007G292100 | 2.5 | 1 | 21 | 58 | 78 | AUAUGAAACUGAGAUACCAUG | AUCGGUAUUUCAGCUUCAUAU | Cleavage |
| gra-miR8703a | Gorai.007G292100 | 5 | 1 | 24 | 440 | 463 | AGUAGUCUAAUUGGUAUAGCUGAA | CCGAAUUGUACCAAUUAAGAUAUU | Cleavage |
| gra-miR8703b | Gorai.007G292100 | 5 | 1 | 24 | 440 | 463 | AGUAGUCUAAUUGGUAUAGCUGAA | CCGAAUUGUACCAAUUAAGAUAUU | Cleavage |
| gra-miR8703c | Gorai.007G292100 | 5 | 1 | 24 | 440 | 463 | AGUAGUCUAAUUGGUAUAGCUGAA | CCGAAUUGUACCAAUUAAGAUAUU | Cleavage |
| gra-miR8709a | Gorai.007G292100 | 3 | 1 | 24 | 321 | 344 | AUAUUAAAACUAUACAUGAACUUU | UGAGUUCAUAAAUGGUUUUGAUAU | Cleavage |
| gra-miR3476 | Gorai.007G295100 | 4.5 | 1 | 21 | 1317 | 1336 | UCGGACUGGAUUUGUUGACAA | UCGUCAA-AGCUCCGGUCUGA | Translation |
| gra-miR530a | Gorai.007G295100 | 5 | 1 | 21 | 681 | 701 | AGGUGCAGAUGCAGUUGCAGG | UCUGCAACAUCAUCUUCAUCA | Cleavage |
| gra-miR7486d | Gorai.007G295100 | 5 | 1 | 21 | 545 | 565 | UGGGGGCGCGCUUUGCUUACG | AGCAAGGGGAGCGUGCUUUCA | Cleavage |
| gra-miR8726 | Gorai.007G295100 | 4.5 | 1 | 21 | 1299 | 1319 | CGAUGGAGUCUGGAGACAAAA | GGGUUUCUUAAGAUUUCAUCG | Cleavage |
| gra-miR8731 | Gorai.007G308900 | 2.5 | 1 | 21 | 427 | 446 | CUAUAAACAGUCGAUGGUAUC | GGUACCGU-GACUGUUUAUAG | Cleavage |
| gra-miR8770 | Gorai.007G322800 | 4.5 | 1 | 24 | 820 | 843 | UUGAUGGUGGUAAGAAAUGUGCAU | GCUAGCUUUUAUGAUCCCCAUCAA | Cleavage |
| gra-miR8779 | Gorai.007G322800 | 5 | 1 | 23 | 430 | 451 | UUUGAUCUAACGUACAGAGACUA | AGGGCUC-GUGAUUUAGAUCAGA | Translation |
| gra-miR8781b | Gorai.007G322800 | 3.5 | 1 | 24 | 760 | 783 | UUUGAUUAGGAAGUUUGAGGAUCA | AAGGGUUCAAACCUUCUAAUCGAC | Cleavage |
| gra-miR827b | Gorai.007G326000 | 3.5 | 1 | 21 | 800 | 820 | UUUGUUUAUGGUCAUCUAAGC | ACUUGCAUGACCAAAAACAAC | Cleavage |
| gra-miR8648 | Gorai.007G326000 | 5 | 1 | 21 | 106 | 126 | UUUCAGCGCAGUAGAAGGAUU | UUUCCUUACAAGGAGCUGAAA | Translation |
| gra-miR8682 | Gorai.007G329800 | 5 | 1 | 21 | 1289 | 1309 | ACUAGCUCAGGCUCUCGGCAG | UAGCUGGGACUUUGGGCUAUU | Cleavage |
| gra-miR8750 | Gorai.007G329800 | 4 | 1 | 24 | 946 | 969 | UCUUAGUUGGCAUAUACUCAAGGA | GUGAAGAUUAUUAGCCAAUUAAGG | Cleavage |
| gra-miR166d | Gorai.007G330000 | 3.5 | 1 | 21 | 625 | 645 | UGAUGGGAAUGUUGUUUGGCU | AGCCAAAUUACCUGCCCAUCA | Translation |
| gra-miR7502b | Gorai.007G330000 | 4.5 | 1 | 21 | 973 | 992 | UUGUUAAAAGUUUCAUCCAUU | AAUGG-UGAAACUUAUAGCAG | Cleavage |
| gra-miR7502c | Gorai.007G330000 | 4.5 | 1 | 21 | 973 | 992 | UUGUUAAAAGUUUCAUCCAUU | AAUGG-UGAAACUUAUAGCAG | Cleavage |
| gra-miR8668 | Gorai.007G330000 | 4 | 1 | 20 | 417 | 436 | UUUUGGAAUCAAGACUACAU | UUCUAAUCUUGAUUUCGAAU | Cleavage |
| gra-miR8675b | Gorai.007G330000 | 4.5 | 1 | 24 | 740 | 763 | AGGUGAUGAUGUGGUACAAUCUCA | CGACAUUUUACCGCAGUAUUACCA | Translation |
| gra-miR8675c | Gorai.007G330000 | 4.5 | 1 | 24 | 740 | 763 | AGGUGAUGAUGUGGUACAAUCUUA | CGACAUUUUACCGCAGUAUUACCA | Translation |
| gra-miR8689 | Gorai.007G330000 | 4 | 1 | 24 | 630 | 653 | AGAGGUGCUCAUGGGCUGGGUCGG | AAUUACCUGCCCAUCAGAACCUUU | Translation |
| gra-miR8705 | Gorai.007G330000 | 4 | 1 | 23 | 2172 | 2194 | AGUUCAUAC-UAGUUCGUGGGUCA | UGACCCA-GAACUAUGUAUGAACU | Translation |
| gra-miR398 | Gorai.007G335000 | 5 | 1 | 21 | 1310 | 1330 | UGUGUUCUCAGGUCACCCCUU | UUGGGGUGGCUCGAGGGCUCG | Translation |
| gra-miR8652 | Gorai.007G335000 | 4 | 1 | 23 | 379 | 401 | AUUAUGUGUAUGAAACUUUAGUU | CCAUUGAGUUUCAUGUAUGUAGU | Cleavage |
| gra-miR8781a | Gorai.007G335100 | 4 | 1 | 24 | 991 | 1014 | UAUUGAAUUAUUUAGAACUAGGAU | CUUCAAAGUCAAAAUAAUUUAAUG | Cleavage |
| gra-miR7492e | Gorai.007G370900 | 4.5 | 1 | 21 | 1451 | 1471 | CCAUGAUCUUUAGCGGCGUUU | UCUUUGCGUUAAAGAUCAUGG | Cleavage |
| gra-miR7492f | Gorai.007G370900 | 4.5 | 1 | 21 | 1451 | 1471 | CCAUGAUCUUUAGCGGCGUUU | UCUUUGCGUUAAAGAUCAUGG | Cleavage |
| gra-miR8650 | Gorai.007G370900 | 4 | 1 | 24 | 1797 | 1820 | AGUGGAAGGACAAAAUGCAAUCUG | GCUCACGGAUUUUGAUCUUUCACU | Translation |
| gra-miR8728 | Gorai.007G370900 | 4 | 1 | 24 | 1198 | 1221 | CGGGCUUGGGCAAAAUUUUAGGCU | AAGGGAGACUUUUCCCAAAGUCCG | Translation |
| gra-miR8737 | Gorai.007G370900 | 4.5 | 1 | 24 | 219 | 241 | GUGUAUCUCCUGAAAACGACGACA | UGUU-UCGUAUCAAGGAGAUGCAA | Cleavage |
| gra-miR8773 | Gorai.007G370900 | 4.5 | 1 | 23 | 1818 | 1840 | UUGGAUGAACGGUGCGUUUACUU | ACUUAGAUGCUCGGUUAAUCCAA | Translation |
